# Supplementary material
Source: PubMed Central journal article supplement (PMC1567926)

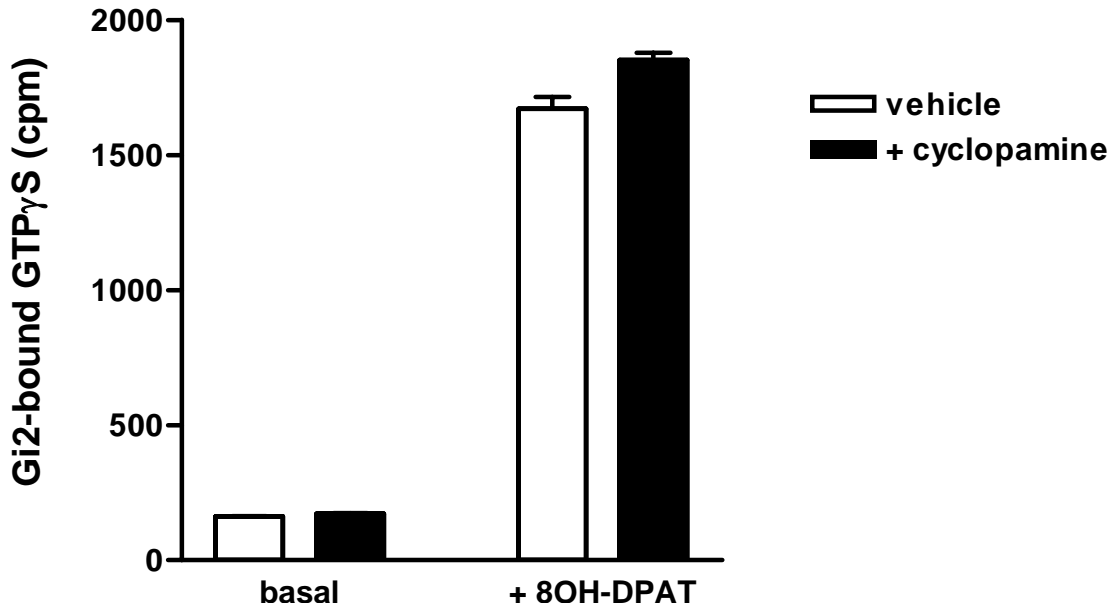

Supplement: pnas_0600880103_1.pdf [file pnas_0600880103_1.pdf]

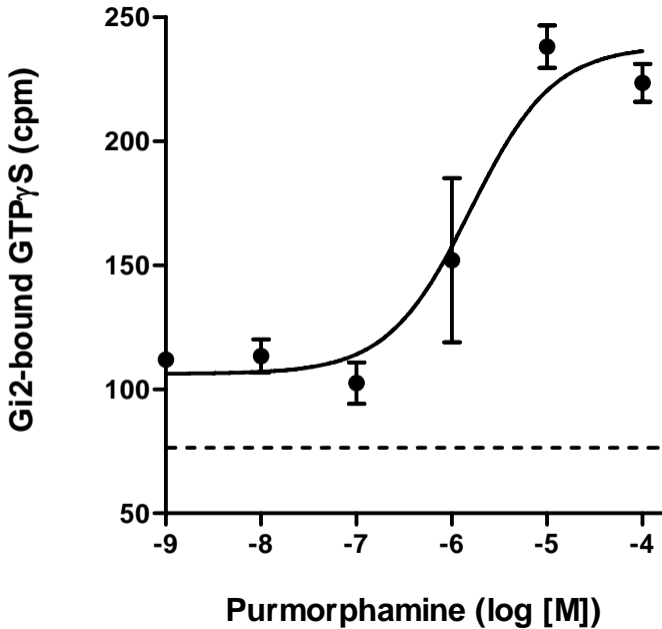

Supplement: pnas_0600880103_2.pdf [file pnas_0600880103_2.pdf]

**Gi2-bound GTP $\gamma$ S  
(% control)**

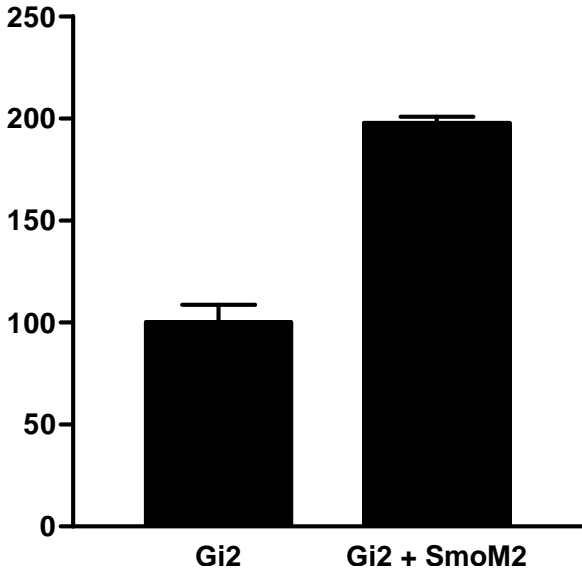

Supplement: pnas_0600880103_3.pdf [file pnas_0600880103_3.pdf]
